# Supplementary material
Source: MDPI journal article supplement (https://www.mdpi.com/1999-4907/14/1/143)
Supplement: s1 [file s1]

Figure S1: Multiple alignments of the amino acid sequences of the MaTCP proteins.

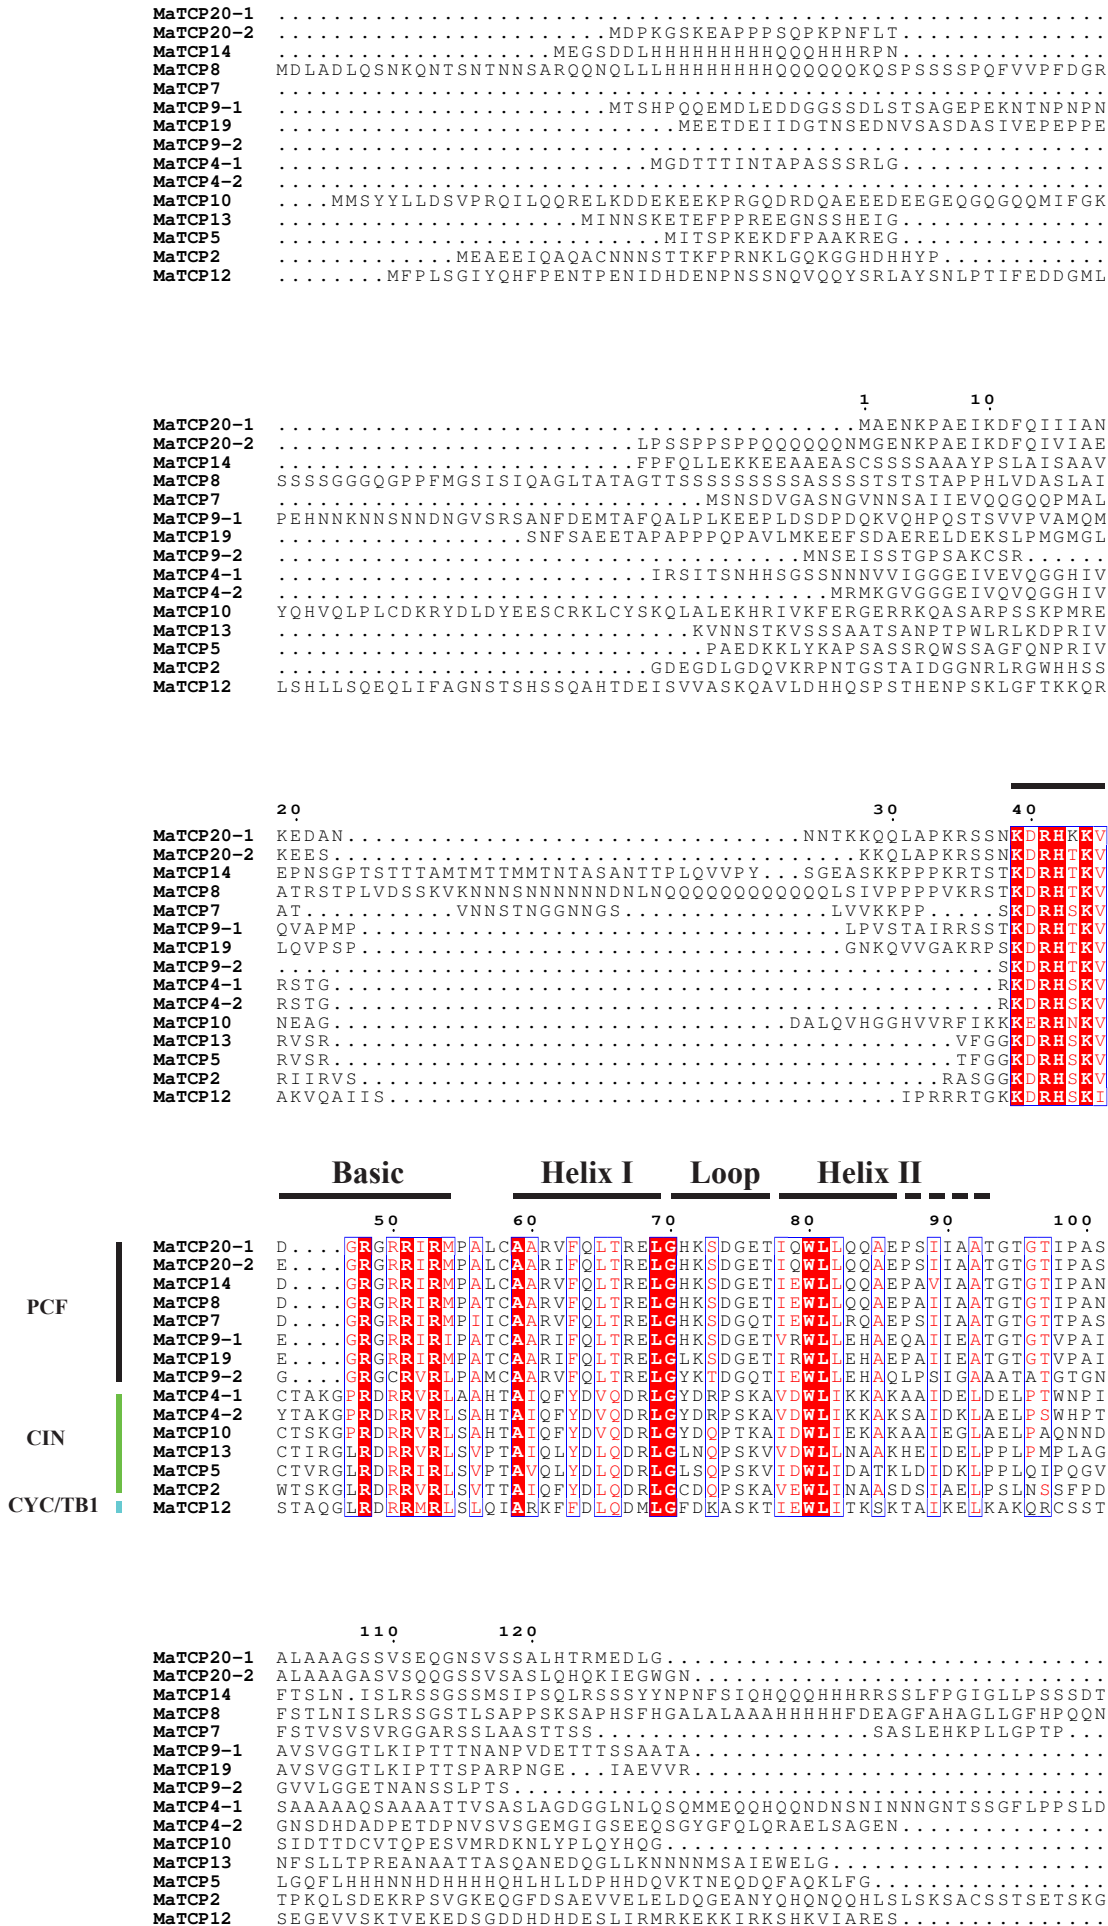

130  
MaTCP20-1 .....RANWAVMS.....  
MaTCP20-2 .....LGRAAAAAAAHVVGATGMWGPPQ.....  
MaTCP14 NNTSTLLNFQSPLLQAKQELRDAAAATTSLELSEAAAEDFGGRKRRQPEQQ.....  
MaTCP8 QQNQPTLMAEALPSGDNNNNDGGGGETTENYMRKRFRFDLFKDDNSTQSQQQGEESSEN  
MaTCP7 .....FILGKRVRPDEGGVKDGSDDGN.....  
MaTCP9-1 .....KKRRRPSNSEFVDLT.....  
MaTCP19 .....KRRRRASNSEFVDVN.....  
MaTCP9-2 .....CSERVCEKK.....  
MaTCP4-1 SDAIADTIKSFFPIASEEQQHNNHNDHQSHHPRVSSSSSIQFYAPDLLSRTS.....  
MaTCP4-2 TDFIADTMKSFFPTTTS.....VAANSSMNFQNYPDNL.....  
MaTCP10 .....CDNWPQKISVGSTSK.....  
MaTCP13 .....STSRQNFWTNTTTSTSTSS.....  
MaTCP5 .....VPSSYMNHQNYTDQTSFYG.....  
MaTCP2 SGLSLSRSEIRVNRVKARER.....ARERAADKERENSISRIPPPPLHNNHHHHQNNIN  
MaTCP12 .....RDKARARARERTREKNLEKSR.....

140 150 160 170  
MaTCP20-1 .....GNLGRSHGIWPGIGG.....FGSGFFPNSGQPTTSFGGE.....  
MaTCP20-2 .....GLVSNSSGGYGVGIGGGF.....QSSSSSSGSMAGGSTGEEGG.....  
MaTCP14 .....DLNSSMGGYLLQSAG.....ASTVPAGHHGQIPANVMV.....  
MaTCP8 KTFKQLPNKQDAAAAAAGSSAGLLRPSNLLPPTAMWAVAPSSGAGSTFWMLP.....  
MaTCP7 .....DGVSVVGG.....TAMGSMVGSAAAPAGGFWAP.....  
MaTCP9-1 .....DPVSKSSGLAPIGPAVP.....QGLVPVWAVAGNASGVNMMV.....  
MaTCP19 .....DQISVSSGLAPIAPT TYGNGAAQGLVPLWPMGPNGG.....  
MaTCP9-2 .....TGQSQDLQLSLQSFQDPILLNHHQQQAQVQAQQAHHNEHGFSSGFGWSDHHHHQN  
MaTCP4-1 .....TQDLGLSLHCFQE.....QGGADEHPPSEQAMFGSVVGFSSGYQR...  
MaTCP4-2 .....DALWKARSKEVARETANNSTTRSEVEKEEGNHEGSSNNLTQRTTN.....  
MaTCP10 .....HGIALPQGYFDGISGHNNLVMSTTNSSTTSFNSGSIQSVS.....  
MaTCP13 .....SISQSPSFTTELLTGGISNVNTNSNNNDSSPTTASDQPNLFHKGSTAMATATATATAMH  
MaTCP5 .....QSTTPTTSSSPEAANNSTNTSVDLGKLRPNSSSLKMGASRFDQEFF...  
MaTCP2 .....  
MaTCP12 .....

180 190 200  
MaTCP20-1 .....NTNMLLPKFQFGHGFDFPPG.....MNLG....AVSFNTIVIGG  
MaTCP20-2 .....GSSNYLQKIGFSGFDLPVTN.....MGMGGPSPHMSFTSILGG  
MaTCP14 .....ANSNSQVMSGDPIWTFPSVNNSGLYRGTMSSGLHFMNFPFPFAL  
MaTCP8 ....VTAGTGVSPVAPATSEQPHMWTFTPTPPSHGSTLQAPLHFMREFNLPGGIDFQGGG  
MaTCP7 .....HFGQVMSFAAAAAPEMVAQPSVQHQHAATSLFVQQQAMG  
MaTCP9-1 .....PANAFWMFPPTAAAAGAGPSSQQPQIOWALSPTVTPVFENMAARPISSSFVANQPAVVG  
MaTCP19 .....AAGPFLMFPNSGAVPGVANHAQLWAIPAAAATP.PFFGVQARPISNFVS.....  
MaTCP9-2 .....DHVVKCYSFSDQPAFDLTLNFDMEFSANEIALQALTS  
MaTCP4-1 PAEISRFQRI MFNNNGNNGGGGGGGGVFNSSPPLFSRGGENNNNNHHHHNNNNNQFFSF  
MaTCP4-2 .....MVAWNGHDQASDGESESRGFAFAQAPPPQ...LTAHQALLGQGSAAFPFGN  
MaTCP10 .....KFQDCPTEQNSTQGLCLSLQSSDQDLYLHSSPIDFDEQALT  
MaTCP13 .....NHPPFPGLNNIAHIPHGVSYRWEPPNYPLLSHFAGAGHGLNITSQSDQHLQS  
MaTCP5 .....QLFFCAPPSPNSTTTSTFLTSTPYPSYMSSSTTTQYHENPHDTI  
MaTCP2 MDYFTTGLLGLSSTRNHHHHHSSGFAGLPMAMSMPPQPFVSVSSGGDGHATAEALPPQFSF  
MaTCP12 .....GSDQMLDYSISNHIGGVSSGANSDDFLGFPNGWDINIDESSKTESFCG

210 220 230 240  
MaTCP20-1 GN.QQVPGLELGLSQD.GHIRVLNSQTLAQLQQQ...QQMGQRS SGGD G.....  
MaTCP20-2 GASQQAPGLELGLSQDGGCHIGVLNTQALTQMYHQMRVHHQHHS HQQQQ.....  
MaTCP14 MPSQQLGSSDGGGGGGGGGGGGSGGNNLGD SHLSMLTALNPYRQV SGGGGGV.....  
MaTCP8 RGSQQLGSMMLMQQPGAAAAQPSQQLGLGVSESNLGMALALNAY SRGGLNINS DHQHSH  
MaTCP7 EASAARLGNYLP.....GHLNLLASL SGG.....  
MaTCP9-1 PAGVPSAVVEVPSHVAHHGGGLSTSTTSVGP TAAKKTSS TMAPSL SSSGGGGGT TKAQML  
MaTCP19 .....ALQPVLRLDSQVSSGSVNTCSMETTSNAMISTSDGVGA SSSSCSTTTSATQML  
MaTCP9-2 ETQEEEEEEEDKRKE.....  
MaTCP4-1 QRGPLQSSNTPSVRAWIDHTSSSSSSSPLMVMSIADHQIPHSLP GMGFIPS VGGGGFSS  
MaTCP4-2 QRGTQSSSFSTPLARDWDDLPSMAVAAAAAASQRPQQQH IHHQSSS SSSSIFGTRFVSYGG  
MaTCP10 SMSSLTDSTS IDTGRFQSLMAINS SAGNEGAQFFFNLSLP LLQQP FLRENQF.....  
MaTCP13 LNVMSLQPSALSLSSTGSPYTTTTTQTYFPSHSTAASGVELVDSRQV NHFHMLSSNVQNLL  
MaTCP5 RPQM INNH IQLMSANSSTISSTASSSSSSSQFHILNNSLMA SLH TTSVNNNNNNNPP LI  
MaTCP2 VPEQLIATTSQPNSSGGDYSLNF SSSSGLAGFNRTGLQSNSSP TSLPHLQLRFASPID  
MaTCP12 ITVANAKPVVIGNVRQNPCAIFTTTL SFDTKKKKPTSSFFPVIA T SNAQRENPS SIFVT

250 260  
MaTCP20-1 .....GGDSLVPVRHRSPEKDDSQSR.....  
MaTCP20-2 .....QQQQQNPNHQTS AKDSSQSGQ.....  
MaTCP14 .....SESQASGSHGGDDRHDNSNHS.....  
MaTCP8 PLEHHQHQQHQQHQSQATDSGDEDPNNSQ.....  
MaTCP7 .....PGSSGRRDDDP.....  
MaTCP9-1 RDFSLEIYEKRELQFMG.RPGNHQRQSSKP.....  
MaTCP19 RDFSLEIYDKKELQFLGGRSSKSQTQCSKP.....  
MaTCP9-2 .....  
MaTCP4-1 GFHHN.IPARIQGEEE...HDGISDKPSSASS.DSCH.....  
MaTCP4-2 GLPVFRIPARIHGV EEDGGHGVVSER PSSSSSPNSAHN.....  
MaTCP10 .....  
MaTCP13 PNTIRPFHFGANN SKLVGYPPNDNGSDQK.....  
MaTCP5 KSFPAILHPRLLAQSSAYENRQQKDRSTTAG.....  
MaTCP2 GTTNVPFFIGASPMENHHHHHHHHHHHQQFPAGFDGRLQLYYGDGGRHSDQKKGKGN  
MaTCP12 SSSYRHIVEENPSSVFMATSTISHNYAAEEP.....
