# Supplementary material
Source: MDPI journal article supplement (https://www.mdpi.com/1999-4907/14/1/143)
Supplement: s1 [file s1]

**Dataset S1:** Fasta files of MaTCP proteins in mulberry.

> *M.alba*\_G0001316

MDPKGSKEAPPPSQPKPNFLTLPSSPPSPQQQQQNMGENKPAEIKDFQIVIAEKEESKKQ  
LAPKRSSNKDRHTKVEGRGRRIRMPALCAARIFQLTRELGHKSDGETIQWLLQQAEPSIIA  
ATGTGTIPASALAAAGASVSQQGSSVSASLQHQBIEGWGNLGRAAAAAAAHVVGATG  
MWGPPQGLVSNSSGGYGVGIGGGFQSSSSSGSMAGGSTGEEGGGGSSNYLQKIGFSGFDLP  
VTNMGMGGPSPHMSFTSILGGGASQQAPGLELGLSQDGCHIGVLNTQALTQMYHQMGR  
VHHHQHHHHQQQQQQQQQNPQHQTSAKDDSQGSGQ

> *M.alba*\_G0001832

MINNSKETEFPPREEGSSHEIGKVNNSTKVSSSAATSANPTPWRLKDPRIVRVSRVFGG  
KDRHSKVCTIRGLRDRRVRLSVPTAIQLYDLQDRLGLNQPSKVVDWLLNAAKHEIDELPP  
LPMLAGNFSLTLPREANAATTASQANEDQGLLKNNNNMSAIEWELGSTSRQNFWTNTTT  
STSTSSDALWKARSKEVARETANNSTTRSEVEKEEGNHEGSNNLTQRTTNNHPFFPGMLN  
NIAHIPHGVSYRWEPPNYPLLSHFGGAGHGLNITSQSDQHLQSLNVMMSLQPSALSSTGSP  
YTTTTQTYFSPHSTAASGVELVDSRQVNHFHMLSSNVVQNLLPNTIRPFHFGANNKSLVG  
YPPNDNGSDQQK

> *M.alba*\_G0002273

MRMKGVGGGEIVQVQGGHIVRSTGRKDRHSKVYTAKGPRDRRVRLSAHTAIQFYDVQD  
RLGYDRPSKAVDWLIKKAKSAIDKLAELPSWHPTGNSDHDADPETDPNVSVSGEMGIGSE  
EQSGYGFQLQRAELSAGENTDFIADTMKSFFPTTTSVAANSSMNFQNYPQDNLPTQDLGL  
SLHCFQEQGGADHEPPSEQAMFGSVVGFSSGYQRMVAWNGHDQASDGESRGFAFQAPP  
PQLTAAHQALLGQGSAAATPFGNQRTLQSSSFSTPLARDWDDLPSMAVAAAAASQRQQ  
QHIIHQSSSSSSSIFGTRFVSYGGLPVFRIPARIHGVVEEDGGHGVVSRPSSSSSPNSAHN

> *M.alba*\_G0003268

MEETDEIIDGTNSEDNVSASDASIVEPEPPESNFSAEETAPAPPQPAVLMKEEFSDAERELD  
EKSLPMGMGLLQVPSPGNKQVVGAKRPSKDRHTKVEGRGRRIRMPATCAARIFQLTRELG  
LKSDGETIRWLLEHAEPAAIEATGTGTVPAAVSVGGTLKIPTTSPARPNGEIAEVVRKRRR  
ASNSEFVDVNDQISVSSGLAPIPTTYGNGAAQGLVPLWPMGPNGGAAGPFLMFPNSGAV  
PGVANHAQLWAIPAAAATPPFGVQARPISNFVSALQPVQLRDSQVSSGSVSNTCSSTMET  
TSNAMISTSDGVGASSSSCSTTSATQMLRDFSLEIYDKKELQFLGGRSSKSQTQCSKP

> *M.alba*\_G0005407

MTSHPQQEMDLEDDGGSSDLSTSAGEPEKNTNPNPNPEHNNKNNNSNDNGVSRSANFDE  
MTAFQALPLKEEPLDSDPDQKVQHPQSTSVVPVAMQMVAQVPMPLPVSTAIRSSTKDRHT  
KVEGRGRRIRIPATCAARIFQLTRELGHKSDGETVRWLLEHAEQAIEATGTGTVPAAVSV  
GGTLKIPTTTNANPVDETTSSAATAKKRKRPSNSEFVDLTDPVSKSSGLAPIGPAVPQGLV  
PVWAVAGNASGVNMMVPANAFWMFPPTAAAAGAGPSSQQPQIWALSPTVTPVFNMAAR  
PISSFVANQPAVVGPAVPSAVVEVPSHVAHHGGGLSTSTTSVGPTAAKKTSSSTMAPSLSSS  
GGGGGETKAQMLRDFSLEIYEKRELQFMGRPGNHQRQSSKP

> *M.alba*\_G0006782

MAENKPAEIKDFQIIANKEDANNNTKKQQLAPKRSSNKDRHKKVDGRGRRIRMPALCAA  
RVFQLTRELGHKSDGETIQWLLQQAEPSIIAATGTGTIPASALAAAGSSVSEQGNSVSSALH  
TRMEDLGRANWAVMSGNLGRSHGIWPGIGGFGSGFFPNSGQPTTSFGGENTNMLLPKFGF  
HGDFPPGMNLGAVSFNTVIGGGNQVPGLELGLSQDGHIRVLNSQTLAQLQQQQQQMG

QRSSGGDGGGDSLVRHRSPEKDDSQSR

> *M.alba*\_G0007510

MFPLSGIYQHFPENTPENIDHDENPNSSNQVQQYSRLAYSNLPTIFEDDGMLLSHLLSQEQ  
LIFAGNSTSHSSQAHTDEISVVASKQAVLDHHQSPSTHENPSKLGFTKKQRAKVQAIISIPR  
RRTGKKDRHSKISTAQGLRDRRMRLSLQIARKFFDLQDMLGFDKASKTIEWLITKSKTAIK  
ELKAKQRCSSSTSEGEVVSKTVEKEDSGDDHHDHDESLIRMRKEKKIRKSHKVIARESMDKA  
RARARERTREKNLEKSRQSTPTTSSSPEAANNSTNTSVDLGKLRPNNSSLKMGASRFD  
QEFPGSDQMLDYSISNHIGGVSSGANSEDDFLGFPGNWDINIIDESSKTESFCGITVANAKP  
VVIGNVRTQNPCAIFTTTLSFDTKEKKPTSSFFPVIATSNAQRENPSIFVTSSSYRHIVEENP  
SSVFMATSTISHNYAAEEP

> *M.alba*\_G0008688

MSNSDVGASNGVNNSAIIIVQQGQQPMALATVNNSTNGGNNGSLVVKKPPSKDRHSKVD  
GRGRRIRMPIICAARVFQLTRELGHKSDGQTIEWLLRQAEPSIIAATGTGTTPASFSTVSVSV  
RGGARSSLAASSTSSASLEHKPLLGPFPFILGKVRPDEGGVKDGSNDGVSVVGGTA  
MGSMVGSAAAPAGGFWAPHFGQVWSFAAAAAPPEMVAQPSVSQHQHAATSLFVQQQAM  
GEASAARLGNYPGHLNLLASLSGGPGSSGRRDDPR

> *M.alba*\_G0010736

MMSYLLDSVPRQILQQRELKDDEKEEKPRGQDRDQAEEDDEEGEQGQGMIFGKYQ  
HVQLPLCDKRYDLDYEESCRKLCYSKQLALEKHRIVKFERGERRKQASARPSSKPMRENE  
AGDALQVHGGHVVRFIKKERHNKVCSTSKGPRDRRVRLSAHTAIQFYDVQDRLYDQPT  
KAIDWLIEKAKAAIEGLAELPAQNNDSTIDTDCVTQPESVMRDKNLYPLQYHQGCDNWP  
QKISVGSTSKCDKEEQLHLNNEGIFSMVSKFQDCPTEQNSTQGLCLSLQSSSEDQDLYLHHS  
SPIDFDEQALTSMSLTDSTSIDTGRFQSLMAINSSAGNEGAQFFFNLSPLLQQPFLRENQF

> *M.alba*\_G0010963

MEAEIQAQACNNNSTTKFPRNKLQKGGHDHHPGDEGDLGDQVKRPNTGSTAIDGG  
NRLRGWHHSSRIIRVSRASGGKDRHSKVWTSKGLRDRRVRLSVTTAIQFYDLQDRLGCDQ  
PSKAVEWLINAASDSIAELPSLNSSFPDTPKQLSDEKRPSVGKEQGFDSEVVELELDQGE  
ANYQHQNQQHLSLSKSACSSTSETSKGSLSLRSEIRVNRVKARERARERAAKDKEREN  
SDSRIPPPPLHNHHHHHHQNINSISQSPSFTTELLTGGISNVNTNSNNNNNDSSSPTTASDQPNLF  
HKGSTAMATATATATAMHMDYFTTGLLGLSSTRNHHHHHHSSGFAGLPMAMSMPPQFSV  
SSGGDGHTAAEALPPQFSFVPEQLIATTSSQPNGSGGDYSLNFSISSGLAGFNRTLQSNS  
SPSSFLPHLQRFASPIDGTTNVPFFIGASPMENHHHHHHHHHHQFPAGFDGRLQLYGDG  
GRHSDQKGGKGN

> *M.alba*\_G0015368

MNSEISSTGPSAKCSRSKDRHTKVGGRGCRVRLPAMCAARVFQLTRELGYKTDGQTIEWL  
LEHAQLPSIGAAATATGTGNGVVLGGETNANSSLPTSCSERVCEKKDHVVKKCYFSRDQ  
PAFDLFDLLTNFDMEFANEIALQALTSETQEEEEEEEEEDKRKE

> *M.alba*\_G0015857

MDLADLQSNKQNTSNTNNSARQQNQQLLHHHHHHHHHQQQQQQKQSPSSSSPQFVVPFD  
GRSSSSGGGQGPFGMSISIQAGLTATAGTTSSSSSSSSASSSTSTSTAPPHLVDASLAIATR  
STPLVDSSKVKNNSNNNNNDNLNQQQQQQQQQQQLSIVPPPVKRSTKDRHTKVDG  
RGRRIRMPATCAARVFQLTRELGHKSDGETIEWLLQQAEPPIIAATGTGTIPANFSTLNISLR  
SSGSTLSAPPSKSAPHFSGALALAAHHHHHFDEAGFAHAGLLGFHPQQNQNNQPTLM  
AEALPSGDNNNNNDGGGGETTENYMRKRFREDLFKDDNSTQSQQQGESSSNKTFKQLP

NKQDAAAAAAGSSAGLLRPSNLLPPTAMWAVAPSSGAGSTFWMLPVTAGTGVSPVAPATS  
EQPHMWTFPTPPPSHGSTLQAPLHFMPRFNLPGGIDFQGGGRGSQLQLGSMLMQQQPGA  
AAAQPSQQLGLGVSESNLGMLAALNAYSRGGLNINSDDHHQSHPLEHHQHQQHQQHQS  
QATDSGDEDPNNSQ

> *M.alba*\_G0018434

MEGSDDLHHHHHHHHHHQQQHHRPNFPFQLEKKEEAAEASCSSSSAAAYPSLAISAAVE  
PNSGPTSTTTAMTMTMTMTNTASANTTPLQVVPYSGEASKKPPPKRTSTKDRHTKVDGR  
GRRIRMPALCAARVFQLTRELGHKSDGETIEWLLQQAEPVIAATGTGTIPANFTSLNISLRS  
SGSSMSIPSQLRSSSYNPNFSIQHQQQHHHRRSSLFPGIGLLPSSSDTNNTSTLLNFQSPLL  
QAKQELRDAAAATTSLELSEAAEDGFGRKRRQPEQQDLNSSMGGYLLQSAGASTVPAG  
HHHGQIPANFWMVANSNSQVMMSGDPIWTFPSVNNSGLYRGTMSGLHFMNFPTPFALMP  
SQQLGSSDGGGGGGGGGGGGSGGGNNLGDSHLSMLTALNPYRQVSGGGGGVSESQASGS  
HGGDDRHDNSHHS

> *M.alba*\_G0018610

MITSPKEKDFPAAKREGPAEDKKLYKAPSASSRQWSSAGFQNPRIVRVSRTFGGKDRHSK  
VCTVRGLRDRRIRLSVPTAVQLYDLQDRLGLSQPSKVIDWLIDATKLDIDKLPLQIPQGV  
GQFLHHNNHDDHHHHQHLLHLLDPHHDQVKTNEQDQFAQKLFVPSYMNHYQNYTDQ  
TSFYGHGIALPGQYFDGISGHNNLVMSTTNSSTTSSFNSSISQSVSQLFFCAPPSNSTTTTS  
FLTSTPYPSYMSSTTTQYHENPHDTIRPQMINNHIQLMSANSSTISSTSASSSSSSQQFHILN  
NSLMASLHTTSVNNNNNNNNPPLIKSFPAIHPRLLAQSSAYENRQQKDRSTTAG

> *M.alba*\_G0019145

MGDTTINTAPASSSRLGIRSITSNHHSGSSNNNVVIGGGEIVEVQGGHIVRSTGRKDRHSK  
VCTAKGPRDRRVRLAAHTAIQFYDVQDRLGYDRPSKAVDWLIKKAKAAIDELDELPTWN  
PISAAAAAQSAATTVSASLAGDGGNLQSQMMEQQHQQNDNSNINNNGNTSSGFLPP  
SLDSDAIADTIKSFFPIASEEQHHNHNQDHQSHHPRVSSSSSIQFYAPDLLSRTSTGQSQDL  
QLSLQSFQDPILLNHHQQAQVQAQQAHHNEHGFFSGFGWSDHHHHQNPAEISRFQRIMF  
NNNGGNNGGGGDGGFVFNPPPLFSRGGENNNHHHHNNNNNNQFFSFQRGPLQSSNT  
PSVRAWIDHTSSSSSSPLMVMSSIADHQIPHSLPGMGFIPSVGGGGFSSGFHHNIPARIQGE  
EEHDGISDKPSSASSDSCH
