# Supplementary material
Source: MDPI journal article supplement (https://www.mdpi.com/1999-4907/14/1/143)
Supplement: s1 [file s1]

**Table S1.** TF IDs and common names of the TCP transcription factors used in the phylogentic analyses.

| TF ID           | Common name |
|-----------------|-------------|
| M.alba_G0010963 | MaTCP2      |
| M.alba_G0019145 | MaTCP4-1    |
| M.alba_G0002273 | MaTCP4-2    |
| M.alba_G0018610 | MaTCP5      |
| M.alba_G0008688 | MaTCP7      |
| M.alba_G0015857 | MaTCP8      |
| M.alba_G0005407 | MaTCP9-1    |
| M.alba_G0015368 | MaTCP9-2    |
| M.alba_G0010736 | MaTCP10     |
| M.alba_G0007510 | MaTCP12     |
| M.alba_G0001832 | MaTCP13     |
| M.alba_G0018434 | MaTCP14     |
| M.alba_G0003268 | MaTCP19     |
| M.alba_G0006782 | MaTCP20-1   |
| M.alba_G0001316 | MaTCP20-2   |
| CCG000586.1     | PeuTCP1     |
| CCG001135.1     | PeuTCP2     |
| CCG002481.1     | PeuTCP3     |
| CCG002729.1     | PeuTCP4     |
| CCG003334.1     | PeuTCP5     |
| CCG005156.1     | PeuTCP6     |
| CCG006044.1     | PeuTCP7     |
| CCG006216.1     | PeuTCP8     |
| CCG007195.1     | PeuTCP9     |
| CCG007701.1     | PeuTCP10    |
| CCG007964.1     | PeuTCP11    |
| CCG009717.1     | PeuTCP12    |
| CCG010631.1     | PeuTCP13    |
| CCG011685.1     | PeuTCP14    |
| CCG012390.1     | PeuTCP15    |
| CCG012899.1     | PeuTCP16    |
| CCG013012.1     | PeuTCP17    |
| CCG015462.1     | PeuTCP18    |
| CCG018013.1     | PeuTCP19    |
| CCG018118.1     | PeuTCP20    |
| CCG019123.2     | PeuTCP21    |
| CCG020734.1     | PeuTCP22    |
| CCG021224.1     | PeuTCP23    |
| CCG023727.1     | PeuTCP24    |
| CCG024429.1     | PeuTCP25    |
| CCG025130.1     | PeuTCP26    |

---

|             |          |
|-------------|----------|
| CCG026334.1 | PeuTCP27 |
| CCG026357.1 | PeuTCP28 |
| CCG026590.1 | PeuTCP29 |
| CCG026656.1 | PeuTCP30 |
| CCG028420.1 | PeuTCP31 |
| CCG031555.1 | PeuTCP32 |
| CCG032104.1 | PeuTCP33 |
| AT1G67260.1 | AtTCP1   |
| AT4G18390.1 | AtTCP2   |
| AT1G53230.1 | AtTCP3   |
| AT3G15030.1 | AtTCP4   |
| AT5G60970.1 | AtTCP5   |
| AT5G41030.1 | AtTCP6   |
| AT5G23280.1 | AtTCP7   |
| AT1G58100.1 | AtTCP8   |
| AT2G45680.1 | AtTCP9   |
| AT2G31070.1 | AtTCP10  |
| AT2G37000.1 | AtTCP11  |
| AT1G68800.1 | AtTCP12  |
| AT3G02150.2 | AtTCP13  |
| AT3G47620.1 | AtTCP14  |
| AT1G69690.1 | AtTCP15  |
| AT3G45150.1 | AtTCP16  |
| AT5G08070.1 | AtTCP17  |
| AT3G18550.1 | AtTCP18  |
| AT5G51910.1 | AtTCP19  |
| AT3G27010.1 | AtTCP20  |
| AT5G08330.1 | AtTCP21  |
| AT1G72010.1 | AtTCP22  |
| AT1G35560.1 | AtTCP23  |
| AT1G30210.1 | AtTCP24  |

---

**Table S2.** List of primers used in the RT-qPCR analyses of *MaTCP* genes.

| Gene Name        | F-primer               | R-primer              |
|------------------|------------------------|-----------------------|
| <i>MaTCP2</i>    | TGCCACCTCAGTTCTCGTTC   | GGACTGAAGGGTCCCCCTAT  |
| <i>MaTCP4-1</i>  | TTCAGTCCAGTAACACGCCC   | TGATCGGCAATCGACGACAT  |
| <i>MaTCP4-2</i>  | CGACGCCGTTTAGCAATCAG   | GGAAGACGAGTGCTGGTGAA  |
| <i>MaTCP5</i>    | GAAAAGGATTTCCCGGCAGC   | GTTTCGAAATCCCGCCGATG  |
| <i>MaTCP7</i>    | CACTTCGGGCAAGTCTGGAG   | TCCGGGAAGGTAATTCCCCA  |
| <i>MaTCP8</i>    | GTGTTTCAGCTGACGAGGGA   | TGTGGAGAAATTCGCCGGAA  |
| <i>MaTCP9-1</i>  | AAGACCGACACACGAAGGTC   | ACTTGTGGCCCAGTTCTCTG  |
| <i>MaTCP9-2</i>  | TCGAGATCAAAAGACCGCCA   | GCATGCTCTAGGAGCCACTC  |
| <i>MaTCP10</i>   | TGATGTCCAAGATCGCCTCG   | TTTTGAGCGGGCAATTCAGC  |
| <i>MaTCP12</i>   | ACAGGCACAGCAAGATCTCC   | TCGACTTCGTGATCAGCCAC  |
| <i>MaTCP13</i>   | AGGATCCGAGGATTGTTTCGC  | AATCCACGACTTTGCTCGGT  |
| <i>MaTCP14</i>   | CTTTGCTTTAATGCCAAGTCAG | GTATGGGTTTAGTGCGGTCAG |
| <i>MaTCP19</i>   | ATTTTCGTCTCGGCTTTGCAG  | CCCTCAACATCTGAGTAGCAC |
| <i>MaTCP20-1</i> | GTGGTTGTTACAGCAAGCCG   | CCCCTCATGACTGCCCAAT   |
| <i>MaTCP20-2</i> | GGTGGTCCTTCACCACACAT   | GGGTCAGAGCCTGAGTGTTT  |

**Table S3.** The length of mulberry seedling roots at five developmental periods.

|             | 1     | 2     | 3     | 4     | 5     | 6     | 7     | 8     | 9     | 10    |
|-------------|-------|-------|-------|-------|-------|-------|-------|-------|-------|-------|
| <b>G-21</b> | 8.34  | 8.61  | 8.71  | 9.05  | 9.72  | 10.19 | 11.12 | 12.23 | 12.55 | 13.05 |
| <b>G-28</b> | 10.92 | 11.24 | 11.59 | 11.70 | 12.49 | 12.53 | 12.58 | 12.71 | 13.12 | 13.46 |
| <b>G-35</b> | 18.53 | 19.03 | 19.22 | 20.52 | 20.74 | 21.65 | 21.74 | 22.03 | 22.08 | 22.75 |
| <b>G-42</b> | 28.63 | 29.09 | 30.62 | 31.02 | 32.15 | 32.61 | 33.17 | 34.24 | 36.47 | 37.50 |
| <b>G-49</b> | 29.13 | 30.06 | 31.49 | 32.26 | 34.22 | 34.43 | 34.61 | 35.77 | 37.42 | 46.75 |

G-21, G-28, G-35, G-42 and G-45 represent days of 21, 28, 35, 42 and 49 after germinating of mulberry seedlings, respectively. Roots from 10 individuals for each period were collected. The unit of measurement is centimeter (cm).
